# Supplementary material for: Surface diffusion manifestation in electrodeposition of metal anodes
Source: Royal Society of Chemistry journal article supplement (doi:10.1039/d0cp01352h), 2020-01-01
Supplement: d0cp01352h1.pdf [file d0cp01352h1.pdf]

## **Supplementary Information**

### **Surface Diffusion Manifestation in Electrodeposition of Metal Anodes**

*Bairav S. Vishnugopi, Feng Hao, Ankit Verma and Partha P. Mukherjee\**

School of Mechanical Engineering, Purdue University, West Lafayette, IN 47907, USA

*\*Correspondence:* pmukherjee@purdue.edu

## 1. Coarse-grained mesoscale model

A coarse-grained meso-scale model has been employed to study the dynamic evolution of the electrochemical system.<sup>1,2</sup> The Kinetic Monte Carlo (KMC)<sup>3</sup> modeling approach incorporates three fundamental mechanisms: metal ion transport in the electrolyte; ion reduction and deposition on the electrode surface; and surface self-diffusion of deposited atoms. A schematic illustrating these three competing mechanisms is shown in Fig. S1.

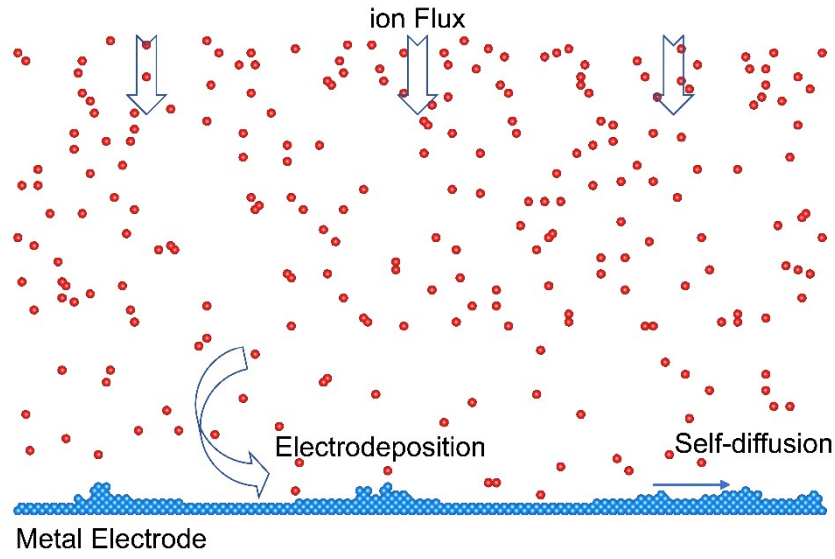

**Fig. S1.** Schematic of metal electrodeposition, including ion transport, deposition on the metal electrode, and surface self-diffusion. Red circles represent ions in the electrolyte, while blue circles represent deposited atoms on metal electrode.

For each of these processes, a rate constant (as described in the manuscript) is first computed at every lattice site in the domain. The three rate constants -  $k_T$  (ion transport rate),  $k_R$  (electrochemical reaction rate) and  $k_D$  (surface diffusion rate) are then used to calculate a corresponding total rate constant as follows:

For the transport of metal ions in the electrolyte,

$$k_1 = \sum_{i=1}^{N_1} k_T^i \quad (S1)$$

Here,  $N_1$  is the number of metal ions in the electrolyte and  $k_1$  is the total ion transport rate.

For the electrochemical reaction of metal ions,

$$k_2 = \sum_{i=1}^{N_2} k_R^i \quad (S2)$$

Here,  $N_2$  is the number of metal ions at the electrode-electrolyte interface and  $k_2$  is the total electrochemical reaction rate.

For surface diffusion of M atoms,

$$k_3 = \sum_{i=1}^{N_3} k_D^i \quad (S3)$$

Here,  $N_3$  is the number of deposited atoms on the electrode and  $k_3$  is the total surface diffusion rate.

Based on  $k_1$ ,  $k_2$  and  $k_3$ , a total rate constant is then obtained as follows:

$$k_{tot} = \sum_{i=1}^3 k_i \quad (S4)$$

A random number  $r_1$ , between 0 to 1 is chosen and multiplied with  $k_{tot}$ . Following this, we scan through all the events and select the first event for which the total rate of previously scanned events is larger than  $r_1 k_{tot}$ . The electrochemical system then evolves based on this selected event.

The time step is calculated using a random number  $r_2$ :

$$\delta t = -\frac{1}{k_{tot}} \ln r_2 \quad (\text{S5})$$

A flowchart describing the algorithm used for the dynamic evolution of the electrochemical system is illustrated in Fig. S2.

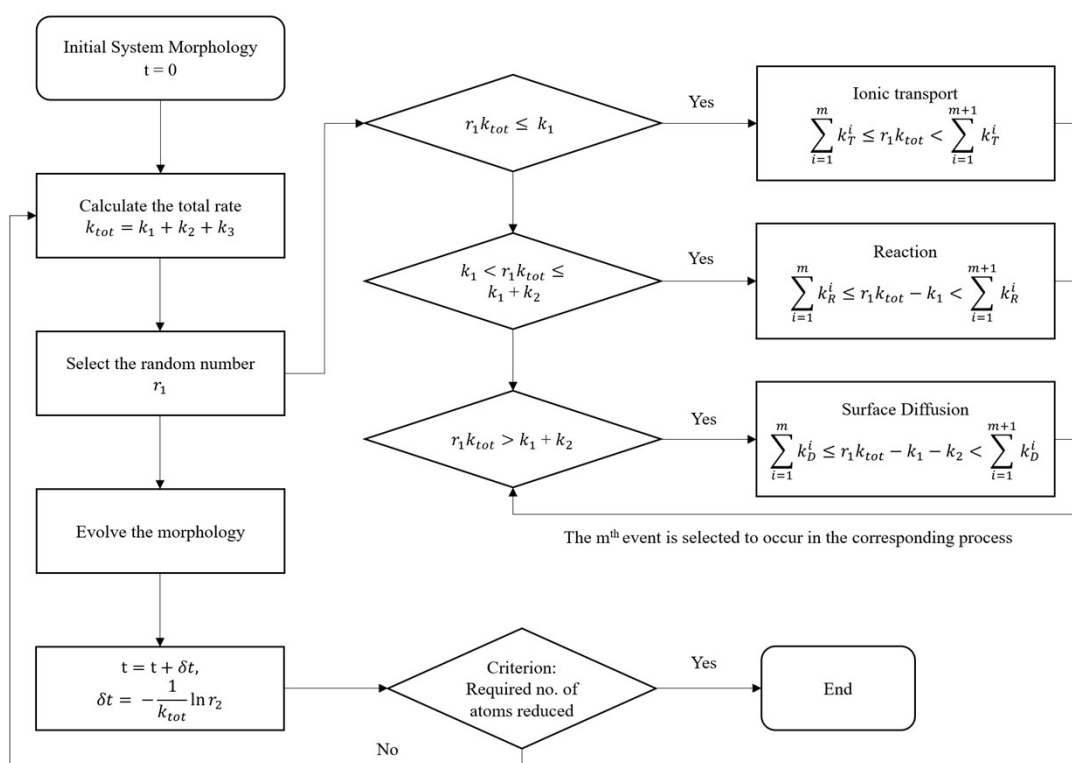

**Fig. S2.** Schematic of the KMC procedure for the dynamic evolution of the electrochemical system

Parameters used in the coarse-grained KMC model have been summarized below in Table S1.

**Table S1.** Parameters used in the model.

| Parameters               |                                | Values                 | Units                                             |
|--------------------------|--------------------------------|------------------------|---------------------------------------------------|
| $\eta$                   | Local overpotential            | 0.3-0.5                | V                                                 |
| $i_0$                    | Exchange current density       | 5                      | mA cm <sup>-2</sup>                               |
| $\alpha$ ( $\beta$ )     | Charge transfer coefficients   | 0.7 (0.3)              |                                                   |
| $E_{a1}, E_{a2}, E_{a3}$ | Self-diffusion barrier heights | 0.01-0.8               | eV                                                |
| $a$                      | Lattice size                   | 3.5                    | Å                                                 |
| $R$                      | Gas constant                   | 8.314                  | J mol <sup>-1</sup> K <sup>-1</sup>               |
| $F$                      | Faraday constant               | 96,487                 | C mol <sup>-1</sup>                               |
| $N_a$                    | Avogadro constant              | 6.022×10 <sup>23</sup> | mol <sup>-1</sup>                                 |
| $k_b$                    | Boltzmann constant             | 1.38×10 <sup>-23</sup> | m <sup>2</sup> kg s <sup>-2</sup> K <sup>-1</sup> |
| $T$                      | Operating temperature          | 300                    | K                                                 |
| $\nu$                    | Jump frequency                 | 2×10 <sup>12</sup>     | s <sup>-1</sup>                                   |

Employing the aforementioned algorithm and modelling parameters that have been summarized above, formation of a fractal growth morphology, along with the presence of an ion depletion zone at the reaction front is illustrated in Fig. S3.

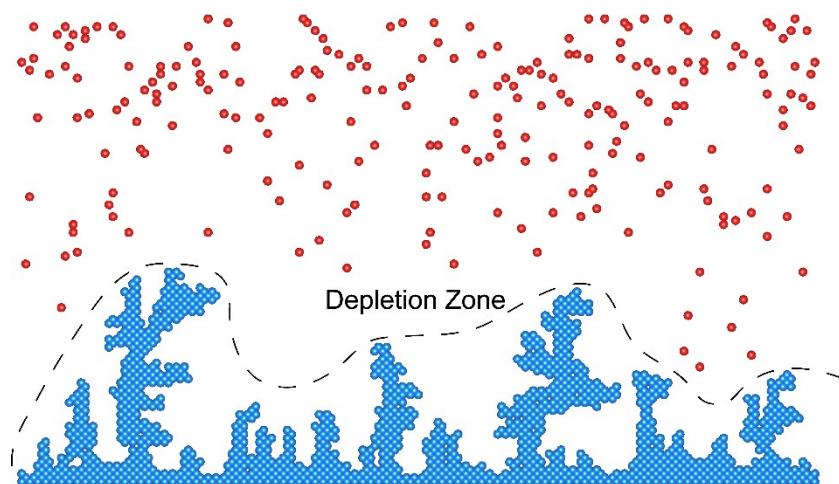

**Fig. S3.** Schematic of ion depletion at the reaction front (denoted by the dashed line) during a dendritic growth mode

#### References:

1. F. Hao, A. Verma and P. P. Mukherjee, *ACS applied materials & interfaces*, 2018, **10**, 26320-26327.
2. F. Hao, A. Verma and P. P. Mukherjee, *Journal of Materials Chemistry A*, 2018, **6**, 19664-19671.
3. A. F. Voter, in *Radiation effects in solids*, Springer2007, pp. 1-23.
